# Supplementary material for: Connectivity alterations in autism reflect functional idiosyncrasy
Source: PubMed Central journal article supplement (PMC8443598; doi:10.1038/s42003-021-02572-6), 2021-09-15
Supplement: 42003_2021_2572_MOESM1_ESM.pdf [file 42003_2021_2572_MOESM1_ESM.pdf]

## CONNECTIVITY ALTERATIONS IN AUTISM REFLECT FUNCTIONAL IDIOSYNCRASY (Supplementary Material)

Oualid Benkarim<sup>1</sup>, Casey Paquola<sup>1</sup>, Bo-yong Park<sup>1</sup>, Seok-Jun Hong<sup>2,3,4</sup>, Jessica Royer<sup>1</sup>, Reinder Vos de Wael<sup>1</sup>, Sara Lariviere<sup>1</sup>, Sofie Valk<sup>5,6</sup>, Danilo Bzdok<sup>1,7,8</sup>, Laurent Mottron<sup>9</sup>, Boris Bernhardt<sup>1</sup>

<sup>1</sup>McConnell Brain Imaging Centre, Montreal Neurological Institute and Hospital, McGill University, Montreal, Quebec, Canada; <sup>2</sup>Center for the Developing Brain, Child Mind Institute, New York, NY, USA; <sup>3</sup>Center for Neuroscience Imaging Research, Institute for Basic Science, Sungkyunkwan University, Suwon, South Korea; <sup>4</sup>Department of Biomedical Engineering, Sungkyunkwan University, Suwon, South Korea; <sup>5</sup>Max Planck Institute for Human Cognitive and Brain Sciences, Leipzig, Germany; <sup>6</sup>INM-7, FZ Jülich, Jülich, Germany; <sup>7</sup>Department of Biomedical Engineering, Faculty of Medicine, McGill University, Montreal, Canada; <sup>8</sup>Mila – Quebec Artificial Intelligence Institute, Montreal, Canada; <sup>9</sup>Centre de recherche du CIUSSS-NIM et Département de Psychiatrie, Université de Montréal, Montreal, Quebec, Canada

|      | Scanner | Modality | Sequence      | TR (ms) | TE (ms) | TI (ms) | FA  | matrix  | #Vol | Voxel (mm <sup>3</sup> ) |
|------|---------|----------|---------------|---------|---------|---------|-----|---------|------|--------------------------|
| IP   | Philips | T1w      | 3D-MPRAGE     | 2500    | 5.60    |         | 30° | 240×240 |      | 1.0×1.0×1.0              |
|      | Achieva | rs-fMRI  | 2D-EPI        | 2700    | 45.00   |         | 90° | 63×63   | 85   | 3.59×3.65×4.0            |
| NYU  | Siemens | T1w      | 3D-TurboFLASH | 2530    | 3.25    | 1100    | 7°  | 256×256 |      | 1.0×1.0×1.3              |
|      | Allegra | rs-fMRI  | 2D-EPI        | 2000    | 15.00   |         | 90° | 80×80   | 180  | 3.0×3.0×4.0              |
| PITT | Siemens | T1w      | 3D-MPRAGE     | 2100    | 3.93    | 1000    | 7°  | 269×269 |      | 1.1×1.1×1.1              |
|      | Allegra | rs-fMRI  | 2D-EPI        | 1500    | 35.00   |         | 70° | 64×64   | 200  | 3.1×3.1×4.0              |
| TCD  | Philips | T1w      | 3D-MPRAGE     | 3000    | 3.90    | 1150    | 8°  | 256×256 |      | 0.9×0.9×0.9              |
|      | Achieva | rs-fMRI  | 2D-EPI        | 2000    | 27.00   |         | 90° | 80×80   | 210  | 3.0×3.0×3.2              |
| USM  | Siemens | T1w      | 3D-MPRAGE     | 2300    | 2.91    | 900     | 9°  | 240×256 |      | 1.0×1.0×1.2              |
|      | TrioTim | rs-fMRI  | 2D-EPI        | 2000    | 28.00   |         | 90° | 64×64   | 240  | 3.4×3.4×3.0              |

**Supplementary Table 1.** Scanner and data acquisition settings. Abbreviations: TR, repetition time; TE, echo time; TI, inversion time; FA, flip angle; #Vol, number of volumes; IP, Institut Pasteur/Robert Debré Hospital; NYU, New York University Langone Medical Center; PITT, University of Pittsburgh, School of Medicine; TCD, Trinity Centre for Health Sciences, Trinity College Dublin; USM, University of Utah, School of Medicine.

|      | N<br>(ASD/TD) | Sex<br>(M/F) | Age      | ADOS    |         |         |          |
|------|---------------|--------------|----------|---------|---------|---------|----------|
|      |               |              |          | Comm    | Behav   | Social  | Total    |
| IP   | 11/21         | 18/14        | 20.5±8.8 | 5.3±2.1 | 1.6±2.1 | 9.5±3.5 | 14.8±5.3 |
| NYU  | 56/70         | 121/5        | 15.0±7.4 | 3.2±1.7 | 1.8±1.2 | 7.6±2.6 | 10.8±3.9 |
| PITT | 20/22         | 42/-         | 20.2±7.1 | 4.2±1.1 | 2.6±1.2 | 8.4±2.3 | 12.7±3.0 |
| TCD  | 18/19         | 37/-         | 15.2±3.3 | 2.9±0.9 | 0.2±0.5 | 5.8±2.4 | 8.7±2.4  |
| USM  | 52/40         | 92/-         | 22.7±7.7 | 4.7±1.4 | 1.8±1.8 | 8.9±2.5 | 13.6±3.3 |
| All  | 157/172       | 310/19       | 18.4±8.0 | 3.9±1.7 | 1.7±1.5 | 8.1±2.8 | 12.0±4.0 |

**Supplementary Table 2.** Demographics for each site. First column (N) indicates the number of individuals with autism (ASD) and typically developing (TD); M/F is the number of males/females in each site. Age and Autism Diagnostic Observation Schedule (ADOS) are expressed in mean and standard deviation. Abbreviations: IP, Institut Pasteur/Robert Debré Hospital; NYU, New York University Langone Medical Center; PITT, University of Pittsburgh, School of Medicine; TCD, Trinity Centre for Health Sciences, Trinity College Dublin; USM, University of Utah, School of Medicine. For ADOS: Comm, ADOS communication; Behav, ADOS repeated behavior/interest; and social and total ADOS.

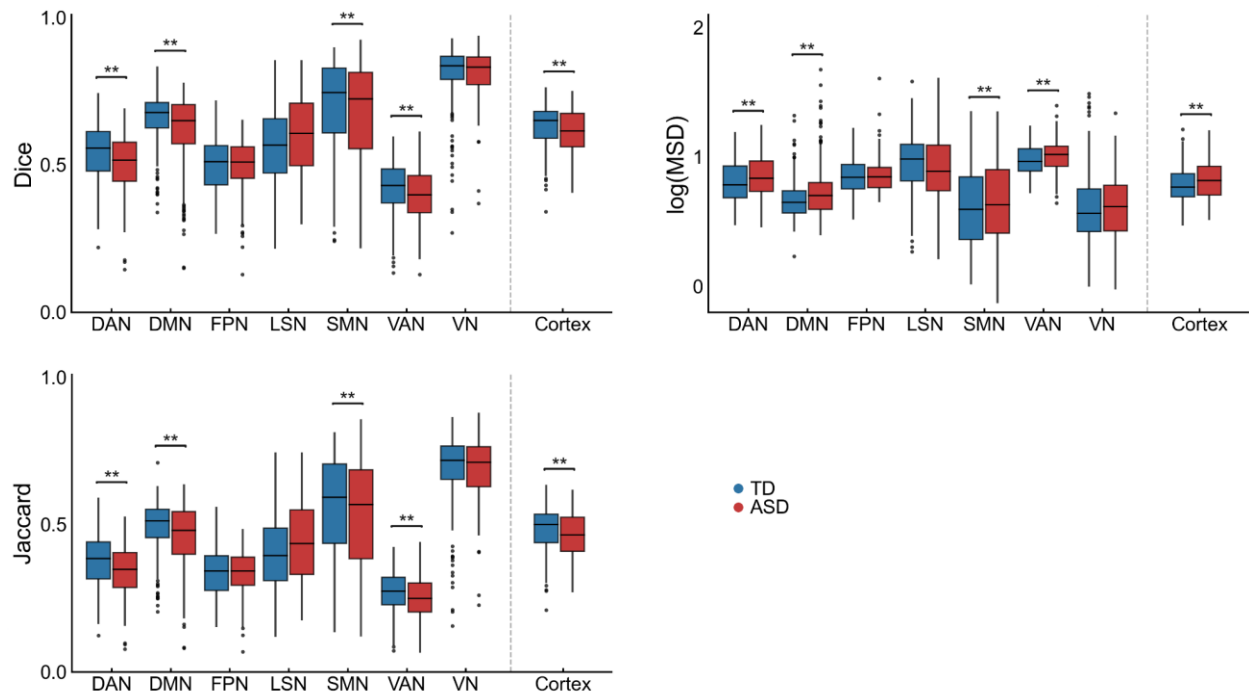

**Supplementary Figure 1.** Group-wise boxplots of Dice score (top-left), mean surface distance (top-right) and Jaccard index (bottom-left) for each intrinsic connectivity network (i.e., cluster) and across the entire cortex. Statistical significance is indicated with \*, \*\* and \*\*\*, respectively denoting  $p < 0.05$ ,  $p < 0.01$ , and  $p < 0.001$  after FDR correction across 7 networks. Abbreviations: DAN, dorsal attention network; DMN, default mode network; FPN, frontoparietal network; LSN, limbic system network; SMN, somatomotor network; VAN, ventral attention network; VN, visual network. Boxes denote the interquartile (IQR) between the first and third quartiles, and the line inside denotes the median. Whiskers extend to points that lie within 1.5 IQRs of the lower and upper quartiles.

| ICN size |                           |
|----------|---------------------------|
| DAN      | $t = -0.20$ , $p = 0.840$ |
| DMN      | $t = -2.06$ , $p = 0.093$ |
| FPN      | $t = 2.44$ , $p = 0.053$  |
| LSN      | $t = 2.62$ , $p = 0.053$  |
| SMN      | $t = -1.72$ , $p = 0.151$ |
| VAN      | $t = 0.64$ , $p = 0.725$  |
| VN       | $t = 0.49$ , $p = 0.725$  |

**Supplementary Table 3.** Intrinsic connectivity network (ICN) size differences between ASD and TD after controlling for age, sex and site. No statistically significant differences were found.

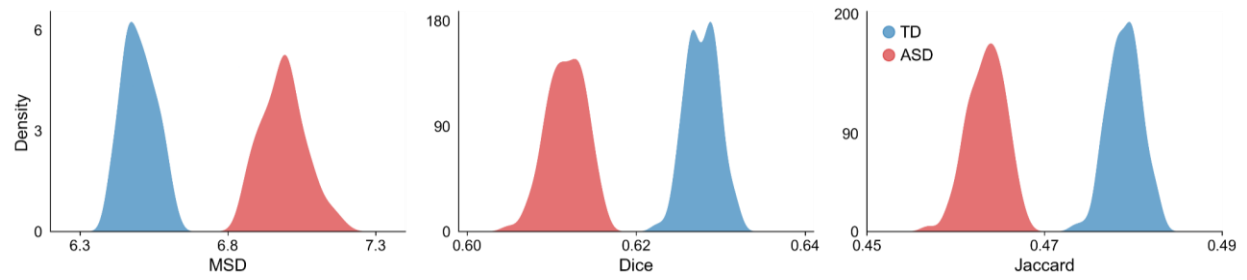

**Supplementary Figure 2.** Distributions of average cortex-wide mean surface distance (MSD), Dice and Jaccard overlap scores based on reference embeddings built from different subsets of subjects chosen at random.

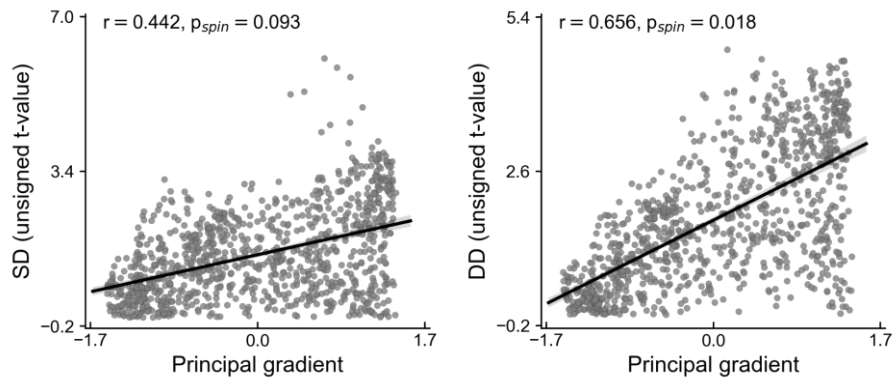

**Supplementary Figure 3.** Emergence of idiosyncrasy along the human cortical hierarchical organization. From left to right, association of idiosyncrasy maps in terms of unsigned t-maps of surface distance (SD) and diffusion distance (DD) with the principal connectivity gradient, where negative values represent sensory/motor regions and positive values correspond to transmodal cortices. Shaded areas around the regression lines denote 95% confidence interval.

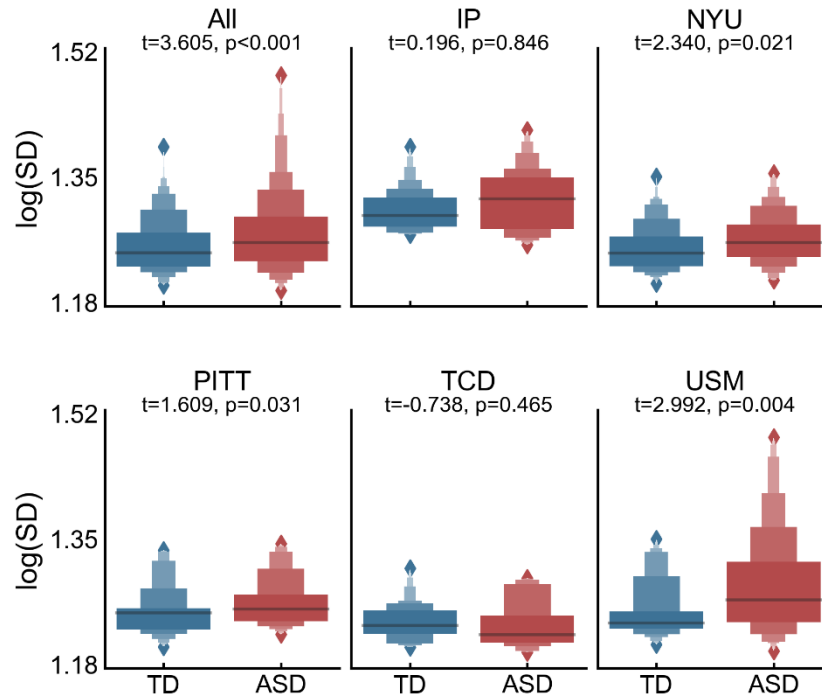

**Supplementary Figure 4.** Site-specific idiosyncrasy differences. Distributions of mean surface distance in TD and ASD for all included sites in the ABIDE I and II datasets and for each site individually.

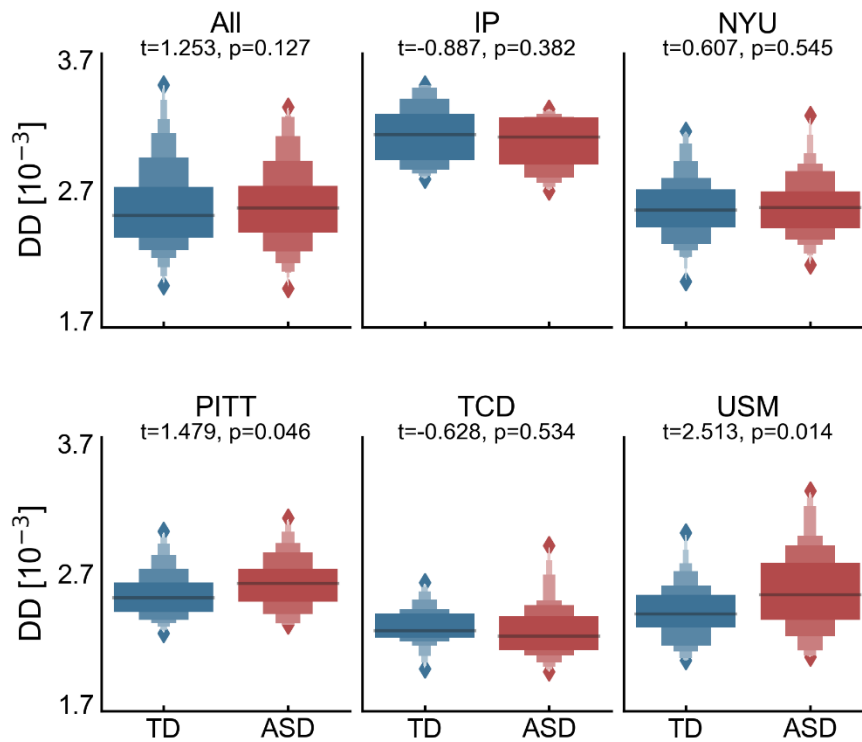

**Supplementary Figure 5.** Site-specific idiosyncrasy differences. Distributions of mean diffusion distance in TD and ASD for all included sites in the ABIDE I and II datasets and for each site individually.

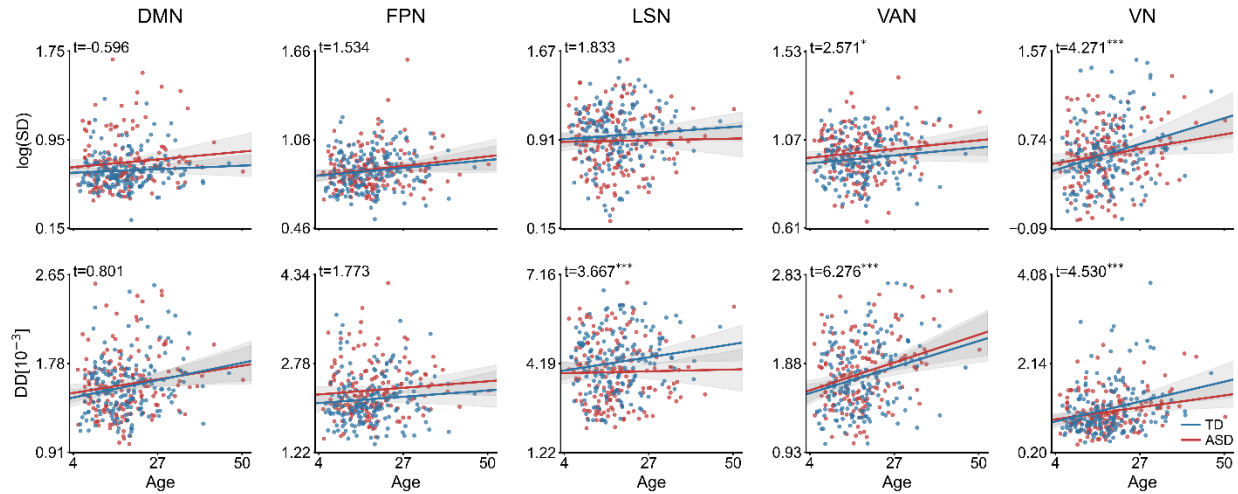

**Supplementary Figure 6.** Relationship of spatial shifting with age. Average surface (top) and diffusion (bottom) distances in ASD and TD versus age for default mode (DMN), frontoparietal (FPN), limbic system (LSN), ventral attention (VAN) and visual (VN) networks. Remaining networks are available in the main document. Statistical significance is indicated with \*, \*\* and \*\*\*, respectively denoting  $p < 0.05$ ,  $p < 0.01$ , and  $p < 0.001$  after FDR correction across 7 networks. Shaded areas around the regression lines denote 95% confidence interval.

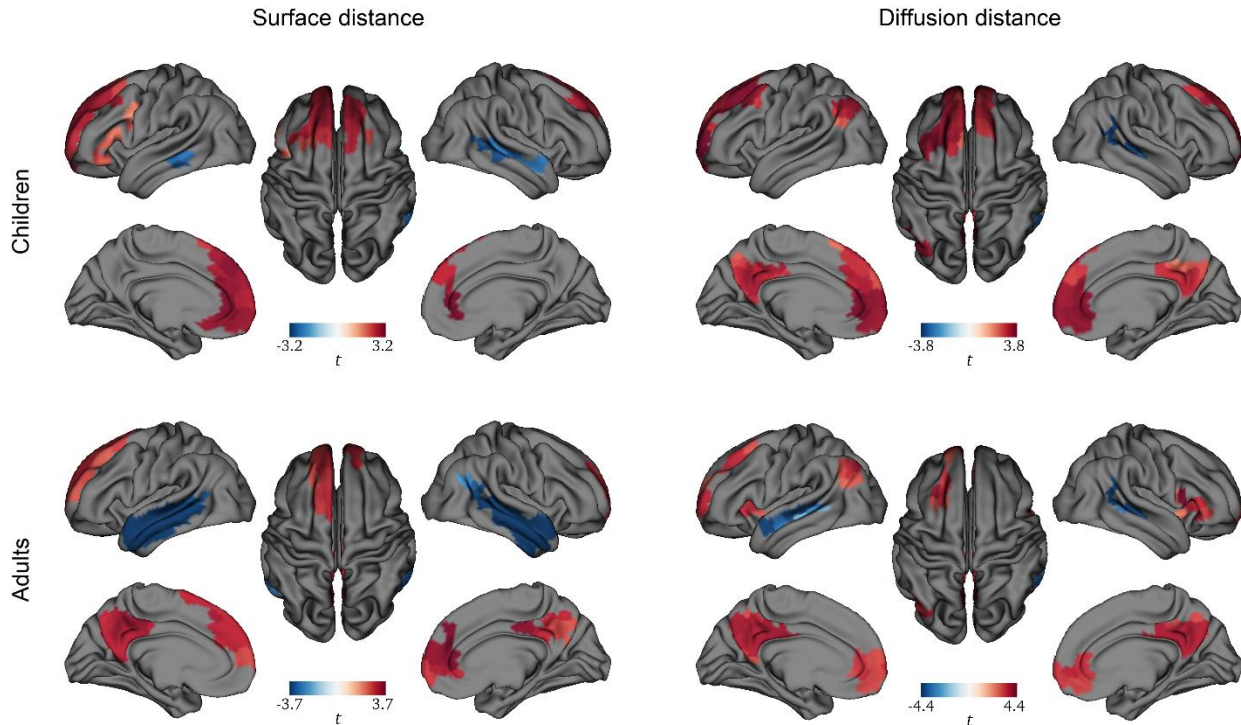

**Supplementary Figure 7.** Idiosyncrasy differences, using surface (left) and diffusion (right) distances, between ASD and TD in children (i.e.,  $< 18$  years) and adults ( $\geq 18$  years). Significance maps obtained using permutation-based thresholding with 10000 permutations.

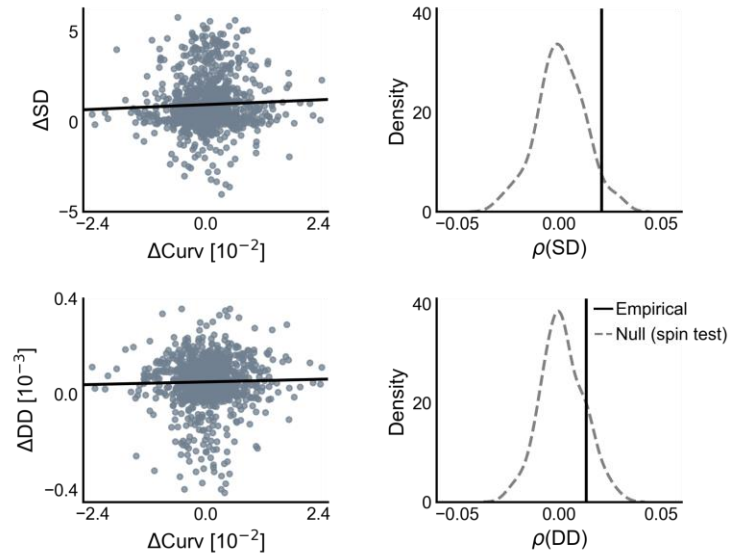

**Supplementary Figure 8.** Correlation of group-wise differences in surface (top) and diffusion (bottom) distances with Mean Curvature Index (Curv), and comparison of empirical correlation with the null distribution obtained using 1000 spin permutation tests to account for spatial autocorrelation.

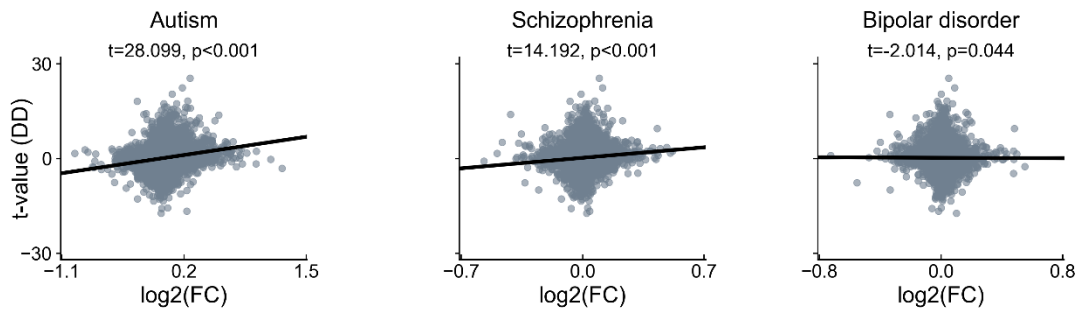

**Supplementary Figure 9.** Associations of gene expression in neuropsychiatric disorders, where  $\log_2(\text{FC})$  stands for  $\log_2$  fold-change of the genes in each disorder and the vertical axis indicates the significance of the relationship strength of the genes with idiosyncrasy in terms of diffusion distance (DD).

| Gene       | Name                                                                  |
|------------|-----------------------------------------------------------------------|
| AGO1       | argonaute RISC component 1                                            |
| ALDH1A3    | aldehyde dehydrogenase 1 family member A3                             |
| ANK1       | ankyrin 1                                                             |
| ANKH       | ANKH inorganic pyrophosphate transport regulator                      |
| BEND6      | BEN domain containing 6                                               |
| CCNO       | cyclin O                                                              |
| COL5A1     | collagen type V alpha 1 chain                                         |
| CPLX1      | complexin 1                                                           |
| DMKN       | Dermokine                                                             |
| ECM1       | extracellular matrix protein 1                                        |
| ESRRG      | estrogen related receptor gamma                                       |
| GLCCI1     | glucocorticoid induced 1                                              |
| GPCPD1     | glycerophosphocholine phosphodiesterase 1                             |
| HS3ST1     | heparan sulfate-glucosamine 3-sulfotransferase 1                      |
| KCNAB3     | potassium voltage-gated channel subfamily A regulatory beta subunit 3 |
| KCNC1      | potassium voltage-gated channel subfamily C member 1                  |
| KCNC3      | potassium voltage-gated channel subfamily C member 3                  |
| LINC00599  | MIR124-1 host gene                                                    |
| LYSMD4     | LysM domain containing 4                                              |
| MAGI2-AS3  | MAGI2 antisense RNA 3                                                 |
| MET        | MET proto-oncogene, receptor tyrosine kinase                          |
| MIR124-2HG | MIR124-2 host gene                                                    |
| MIR29B2CHG | MIR29B2 and MIR29C host gene                                          |
| NFIC       | nuclear factor I C                                                    |
| NIPAL2     | NIPA like domain containing 2                                         |
| NOXO1      | NADPH oxidase organizer 1                                             |
| OIP5-AS1   | OIP5 antisense RNA 1                                                  |
| RAD54B     | RAD54 homolog B                                                       |
| SCN1B      | sodium voltage-gated channel beta subunit 1                           |
| SCRT1      | scratch family transcriptional repressor 1                            |
| SEMA7A     | semaphorin 7A (John Milton Hagen blood group)                         |
| SHD        | Src homology 2 domain containing transforming protein D               |
| SLC25A37   | solute carrier family 25 member 37                                    |
| UPP1       | uridine phosphorylase 1                                               |
| WDR97      | WD repeat domain 97                                                   |

**Supplementary Table 4.** List of genes (symbol and name) significantly associated with idiosyncrasy maps of surface and diffusion distances.

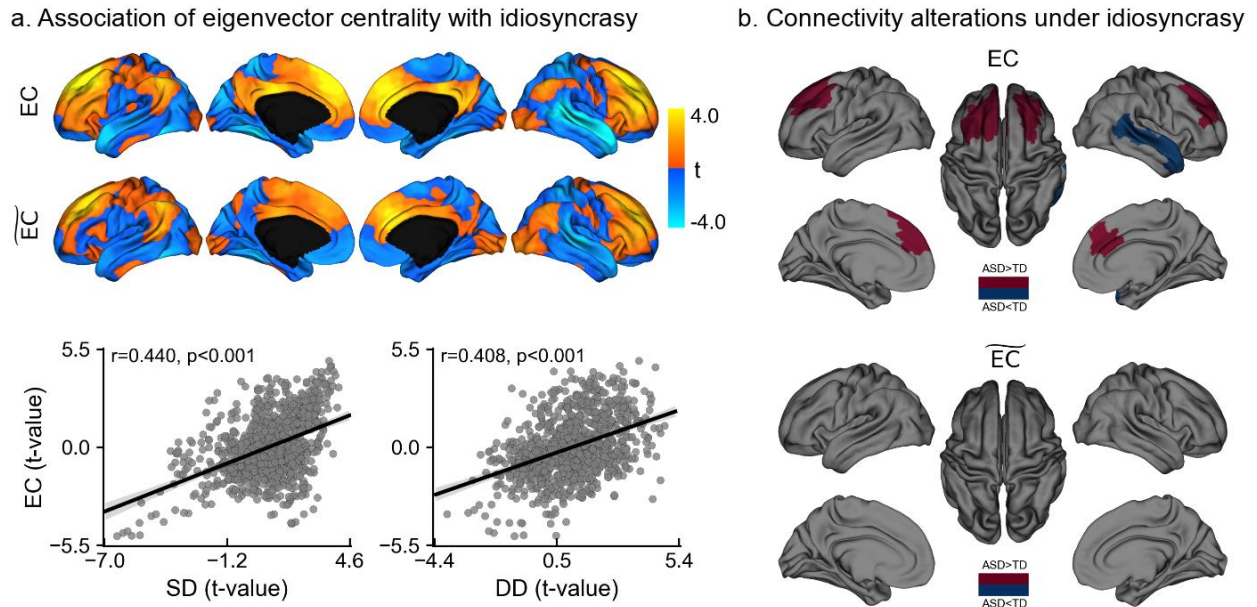

**Supplementary Figure 10.** Association of eigenvector centrality with idiosyncrasy. **a)** Statistical t-maps (top) of areas showing differences in eigenvector centrality between ASD and TD before (i.e., EC) and after controlling for idiosyncrasy (i.e.,  $\overline{EC}$ ), and Pearson's correlation (bottom) of EC t-map with t-maps of surface (SD) and diffusion distances (DD). **b)** Regions showing significant EC increases (red) and decreases (blue) in ASD before (top) and after (bottom) controlling for idiosyncrasy. Idiosyncrasy is represented with SD and DD as additional covariates. Shaded areas around the regression lines denote 95% confidence interval. No significant differences were found after controlling for idiosyncrasy.

|     | SD            | DD           |
|-----|---------------|--------------|
| DAN | $t = 1.99^*$  | $t = 3.98^*$ |
| DMN | $t = 3.34^*$  | $t = 5.39^*$ |
| FPN | $t = 1.95$    | $t = 5.84^*$ |
| LSN | $t = 1.51$    | $t = 4.90^*$ |
| SMN | $t = -2.16^*$ | $t = 4.80^*$ |
| VAN | $t = 1.71^*$  | $t = 3.45^*$ |
| VN  | $t = 2.09^*$  | $t = 5.75^*$ |

**Supplementary Table 5.** Relationship of idiosyncrasy, in terms of network-wise surface (SD) and diffusion (DD) distances, with average eigenvector centrality for each intrinsic connectivity network. Significant associations after FDR correction are denoted with \*.
