# Supplementary material for: Connectivity alterations in autism reflect functional idiosyncrasy
Source: PubMed Central journal article supplement (PMC8443598; doi:10.1038/s42003-021-02572-6), 2021-09-15
Supplement: 42003_2021_2572_MOESM2_ESM.pdf [file 42003_2021_2572_MOESM2_ESM.pdf]

## Description of Additional Supplementary Files

**File name:** Supplementary Data 1

**Description:** Description: Source data for graphs and charts.
